# Supplementary material for: Incidence and clinical impact of respiratory viruses in adults with cystic fibrosis
Source: HighWire-hosted journal article supplement (doi:10.1136/thoraxjnl-2013-204000), 2013-10-14
Supplement: thoraxjnl-2013-204000supp.pdf [file thoraxjnl-2013-204000supp.pdf]

## Supplementary Appendix

### **The incidence and clinical impact of respiratory viruses in adults with cystic fibrosis**

William G. Flight<sup>1,2</sup>, Rowland J. Bright-Thomas<sup>1,2</sup>, Peter Tilston<sup>3</sup>, Kenneth J. Mutton<sup>3</sup>,  
Malcolm Guiver<sup>3</sup>, Julie Morris<sup>1</sup>, A. Kevin Webb<sup>1,2</sup> & Andrew M. Jones<sup>1,2</sup>

- 1: University Hospital of South Manchester NHS Foundation Trust, Manchester, UK
- 2: Institute of Inflammation & Repair, University of Manchester, Manchester, UK
- 3: Department of Virology, Central Manchester University Hospitals NHS Foundation Trust, Manchester, UK

#### **Correspondence to:**

Dr William G. Flight

University Hospital of South Manchester NHS Foundation Trust

Southmoor Road, Manchester, M23 9LT, United Kingdom

Tel +44 161 291 2016

Fax +44 161 291 4323

Email [williamflight@hotmail.com](mailto:williamflight@hotmail.com)

## **METHODS**

### **Respiratory Virus Polymerase Chain Reaction (PCR) Assays**

The PCR assays used in this study were all established in routine clinical practice prior to the start of the study. All PCR assays have been validated in accordance with guidance published by the UK Health Protection Agency (now Public Health England).<sup>1</sup> Details of the primers and probes are given in Table S1. Each PCR run included negative and positive control specimens to exclude false negative results due to the presence of inhibitory compounds within clinical specimens. Positive controls were obtained from the National Institute for Biological Standards & Control (Potters Bar, UK). The PCR assays were performed in a series of duplex and triplex reactions in the following combinations:

- Respiratory Syncytial Virus (RSV) and Metapneumovirus
- Adenovirus and Rhinovirus
- Parainfluenza 1, 2 and 3
- Influenza A and B
- Influenza A Haemagglutinin and Neuraminidase lineage

The PCR assays for parainfluenza 1-3 and influenza B were developed in-house in accordance with the standards set out by the UK Health Protection Agency.<sup>1</sup> The PCR assays for adenovirus, influenza A, metapneumovirus, RSV and rhinovirus followed methods published by other research groups as follows:

- Adenovirus Heim et al<sup>2</sup>
- Influenza A WHO/CDC 2009 protocol<sup>3</sup>
- Metapneumovirus Maertzdorf et al<sup>4</sup>
- Respiratory Syncytial Virus van Elden et al<sup>5</sup>
- Rhinovirus Sheltinga et al<sup>6</sup>

## **Rhinovirus Sub-Typing Methods**

Sequencing of the P1-P2 region of the rhinovirus 5' untranslated region (UTR) was performed using a modification of the method described by Lee *et al.*<sup>7</sup> Total nucleic acids were extracted from respiratory specimens using the QIAamp<sup>®</sup> Virus Biorobot<sup>®</sup> MDx instrument (Qiagen, Hilden, Germany) in accordance with the manufacturer's instructions. Rhinovirus RNA was converted to cDNA and amplified using a two-step PCR assay containing the pan-rhinovirus P1 forward primer (CAAGCACTTCTGTWCCCC) and the P3 reverse primer (ACGGACACCCAAAGTAG). Primers and PCR reagents were sourced from Life Technologies Ltd (Paisley, UK). The product of the first round PCR assay was amplified using a semi-nested PCR comprising the P1 forward primer and three reverse primers: P2-1 (TTAGCCACATTCAGGGGC), P2-2 (TTAGCCACATTCAGGAGCC) and P2-3 (TTAGCCGCATTCAGGGG). Electrophoresis using a 1.5% agarose gel was performed to confirm successful amplification of cDNA. The semi-nested PCR product was treated with exonuclease/shrimp alkaline phosphatase to remove excess primers and deoxyribonucleotide triphosphates.

Genetic sequencing of the 5'UTR region was performed using the Applied Biosystems 3130xl Genetic Analyzer (Life Technologies Ltd, Paisley, UK). The P1, P2-1, P2-2 and P2-3 primers were employed in the sequencing reaction. Raw sequencing data was edited manually using Sequencher v4.7 (Gene Codes Corporation, Michigan, USA) to correct mis-called bases. Individual DNA fragments were trimmed to 270 bp to match the length of the 5' UTR sequences of the reference rhinovirus strains reported by Lee *et al.*<sup>7</sup> The resulting sequences were compared with the National Center for Biotechnology Information (NCBI) GenBank database using the BLASTn interface. A local BLAST database was also created

using the sequences reported by Lee *et al* to allow a further means of identifying individual rhinovirus strains.<sup>7</sup> Phylogenetic analysis using the neighbour-joining method with 500 bootstraps was performed in ClustalW to assign individual sequences to the appropriate rhinovirus major group.<sup>8</sup> Phylogenetic trees were edited in MEGA v5.1.<sup>9</sup>

### **Additional Statistical Methods**

A number of additional analyses are reported in this supplementary appendix. Firstly, generalised estimating equation (GEE) models as described in the main paper were used to assess the difference in clinical outcomes between episodes of rhinovirus A and B infection. The GEE models used logistic regression structures for binary variables and linear regression structures for continuous variables.

Receiver operating characteristic (ROC) curve analysis was used to determine the diagnostic utility of the upper respiratory tract infection (URTI) score. The area under the ROC curve was calculated as well as the sensitivity, specificity, positive- and negative predictive values of the URTI score at each cut-off.

No imputation of missing data was performed throughout the analysis of this study.

**Table S1. Primers and probes for respiratory virus polymerase chain reaction assays.**

|                        | <b>FORWARD</b>                                 | <b>REVERSE</b>               | <b>PROBE</b>                             |
|------------------------|------------------------------------------------|------------------------------|------------------------------------------|
| <b>Influenza A</b>     | GAGTCTTCTAACMGAGGTCGAAACGTA                    | GGGCACGGTGAGCGTRAA           | FAM-TCCTGTCACCTCTGAC-MGB NFQ             |
| <b>Influenza B</b>     | AATGTTYCAAATATCAGACAAAAACAAA                   | CTGTGTCCCTCCCAAAGAAGAA       | VIC-AATTAAGCAGACCATCCC-MGB               |
| <b>Rhinovirus</b>      | (1)GACARGGTGTGAAGAGCC<br>(2)GACATGGTGTGAAGACYC | CAAAGTAGTYGGTCCCATCC         | VIC-TCCTCCGGCCCCTGAATGYGGCTAA-TAMRA      |
| <b>Adenovirus</b>      | GACATGACTTTCGAGGTCGATCCCATGGA                  | CCGGCTGAGAAGGGTGTGCGCAGGTA   | FAM-CACCGCGGCGTCAT-TAMRA                 |
| <b>RSV-A</b>           | GTGCAGGGCAAGTGATGTTAC                          | CACCCAATTTTTGGGCATATTC       | FAM-ACAACCTGTTCCATTTCTGC-MGB             |
| <b>RSV-B</b>           | TTCAGGGCAAGTAATGCTAAGATG                       | CCTCCCAACTTCTGTGCATACTC      |                                          |
| <b>MPV ALT</b>         | CAACAACATAATGCTAGGACATGTATC                    | CCGAGAACAACACTAGCAAAGTTG     | VIC-TGGTGCAGAGAAATGGGTCTCTGAATCTGG-TAMRA |
| <b>MPV N</b>           | CATATAAGCATGCTATATTAAGAGTCTC                   | CCTATTTCTGCAGCATATTTGTAATCAG | VIC-TGYAATGATGAGGGTGTCACTGCGGTTG-TAMRA   |
| <b>Parainfluenza 1</b> | ACAGATGAAATTTCAAGTGCTACTTTAGT                  | GCCTCTTTAATGCCATATTATCATTAGA | NED-ATGGTAATAAATCGACTCGCT-MGB            |
| <b>Parainfluenza 2</b> | CTATGAAAACCATTTACCTAAGTGATGGA                  | CCTCCYGGTATRGCAGTGACTGAA     | VIC-TCAATCGAAAAGCT-MGB                   |
| <b>Parainfluenza 3</b> | ACAGTGGATCAGATTGGGTCAAT                        | ATGGTTGTGAGGTCATTTCTGCT      | FAM-CGGTCTCAACAGAGCT-MGB                 |

RSV: respiratory syncytial virus; MPV: metapneumovirus

## SUPPLEMENTARY RESULTS

### Dual Viral Infections

A total of nine dual viral infections were seen during the study. Details of these dual infections are given in Table S2 below. In five of these cases, the two different viruses were detected in a single specimen (i.e. sputum, nose- or throat-swab). In the remaining four cases, two different viruses were detected in two separate specimen types.

**Table S2. Combinations of viruses seen in dual viral infection**

| <b>Virus 1</b>             | <b>Virus 2</b>   | <b>Number of Episodes</b> |
|----------------------------|------------------|---------------------------|
| Rhinovirus                 | Metapneumovirus  | 4                         |
| Rhinovirus                 | Adenovirus       | 1                         |
| Rhinovirus                 | Parainfluenza 3  | 1                         |
| Rhinovirus                 | Influenza A/H1N1 | 1                         |
| Influenza A/H1N1           | Influenza B      | 1                         |
| Influenza A (unidentified) | Metapneumovirus  | 1                         |

**Table S3. Comparison of clinical outcomes between rhinovirus A and B infection using generalized estimating equation models**

|                                                       | <b>Rhinovirus A</b> | <b>Rhinovirus B</b> | <b>Odds Ratio</b>               | <b>95% CI</b>  | <b>p</b> |
|-------------------------------------------------------|---------------------|---------------------|---------------------------------|----------------|----------|
| Number of visits                                      | 29                  | 11                  | -                               | -              | -        |
| Pulmonary exacerbation n (%)                          | 18 (62.1)           | 5 (45.5)            | 1.82                            | 0.37 to 8.97   | 0.461    |
| Any ABx; n (%)                                        | 24 (82.8)           | 6 (54.5)            | 4.44                            | 0.27 to 73.4   | 0.298    |
| IV ABx; n (%)                                         | 8 (27.6)            | 1 (9.1)             | 3.54                            | 0.51 to 24.5   | 0.200    |
|                                                       | <b>Rhinovirus A</b> | <b>Rhinovirus B</b> | <b>Adjusted Mean Difference</b> | <b>95% CI</b>  | <b>p</b> |
| Percent fall in FEV <sub>1</sub> relative to baseline | 13.8 (12.6)         | 15.8 (9.9)          | -3.17                           | -9.8 to +3.5   | 0.352    |
| URTI score (out of 27)                                | 12.5 (7.1)          | 6.5 (5.6)           | 3.82                            | +0.76 to +6.89 | 0.014    |
| PEx score (out of 12)                                 | 4.5 (2.3)           | 3.5 (1.8)           | 0.88                            | -0.76 to +2.53 | 0.292    |
| log CRP (mg/l)*                                       | 2.77 (1.27)         | 1.77 (0.75)         | 0.98                            | +0.25 to +1.71 | 0.008    |
| White cell count (x10 <sup>9</sup> )                  | 10.6 (10.6)         | 9.8 (2.3)           | 0.88                            | -0.31 to +2.07 | 0.147    |

Data are presented as n (%) for binary variables and mean (SD) for continuous variables. Rhinovirus B was the comparator in each analysis.

\* CRP values were log-transformed to correct for non-normal distribution. Mean CRP levels were 32.9 (42.2) for rhinovirus A and 7.7 (6.7) for rhinovirus B.

ABx: antibiotics; IV: intravenous; FEV<sub>1</sub>: forced expiratory volume in 1 sec; URTI: upper respiratory tract infection; PEx: pulmonary exacerbation; CRP: C-reactive protein

**Table S4. Odds of individual symptoms being present at virus-positive compared with virus-negative visits**

| <b>PEx Score[10]</b>             | <b>OR</b> | <b>95 % CI</b> | <b>p value<sup>#</sup></b> | <b>URTI Score[11]</b> | <b>OR</b> | <b>95% CI</b> | <b>p value<sup>#</sup></b> |
|----------------------------------|-----------|----------------|----------------------------|-----------------------|-----------|---------------|----------------------------|
| Change in sputum                 | 2.04      | 1.5 – 2.8      | <0.001                     | Runny nose            | 1.47      | 1.1 – 2.1     | 0.023                      |
| Haemoptysis                      | 1.26      | 0.8 – 2.0      | 0.307                      | Sneezing              | 1.59      | 1.1 – 2.3     | 0.013                      |
| ↑ Cough                          | 2.08      | 1.5 – 2.9      | <0.001                     | Blocked nose          | 1.39      | 0.99 – 2.0    | 0.058                      |
| ↑ Dyspnoea                       | 1.48      | 1.1 – 2.0      | 0.010                      | Itchy eyes            | 1.19      | 0.8 – 1.7     | 0.331                      |
| Malaise                          | 1.20      | 0.9 – 1.6      | 0.233                      | Sore throat           | 2.52      | 1.7 – 3.8     | <0.001                     |
| Pyrexia >38°C                    | 1.73      | 0.95 – 3.2     | 0.072                      | Hoarse voice          | 2.15      | 1.6 – 3.0     | <0.001                     |
| Anorexia                         | 1.72      | 1.1 – 2.6      | 0.013                      | Fever/shivers         | 1.46      | 1.02 – 2.1    | 0.037                      |
| Sinus pain                       | 1.38      | 0.98 – 1.9     | 0.063                      | Headache              | 1.17      | 0.9 – 1.6     | 0.309                      |
| Sinus discharge                  | 2.05      | 1.4 – 3.0      | <0.001                     | Myalgia               | 1.19      | 0.8 – 1.7     | 0.347                      |
| New signs                        | 0.59      | 0.3 – 1.06     | 0.079                      |                       |           |               |                            |
| Fall in FEV <sub>1</sub><br>>10% | 0.91      | 0.6 – 1.4      | 0.650                      |                       |           |               |                            |
| New CXR<br>findings              | 1.3       | 0.4 – 4.6      | 0.682                      |                       |           |               |                            |

PEx: pulmonary exacerbation; URTI: upper respiratory tract infection; FEV<sub>1</sub>: forced expiratory volume in 1 sec; CXR: chest x-ray; OR: odds ratio; CI: confidence interval

# Level of significance set at 0.01 *a priori* to take account of multiple comparisons



## SUPPLEMENTARY FIGURES

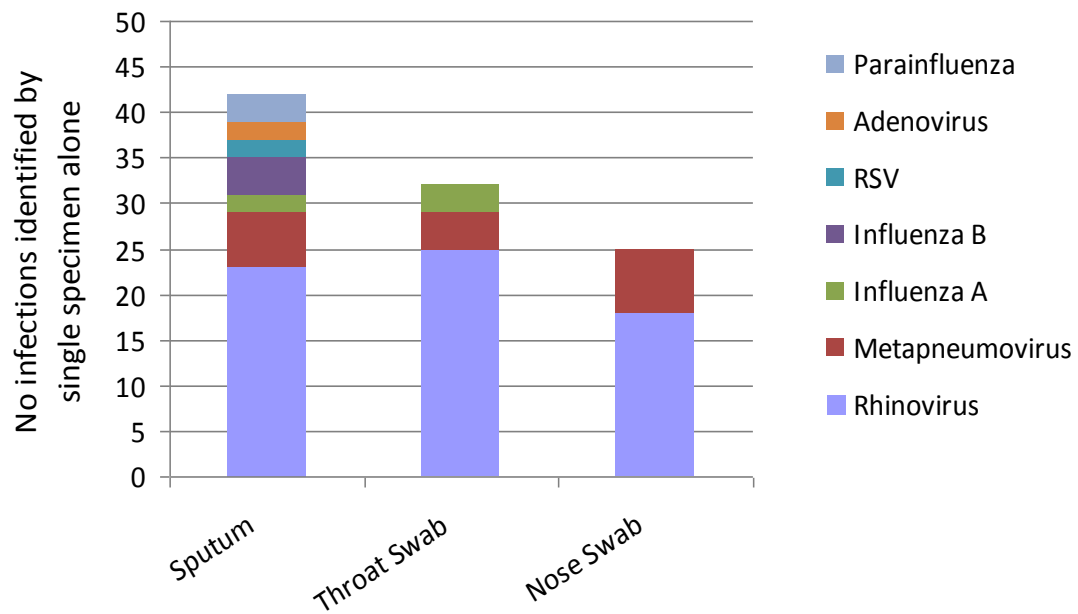

**Figure S1. Breakdown of viruses identified by each sample type at study visits where only one specimen was positive**

RSV: respiratory syncytial virus

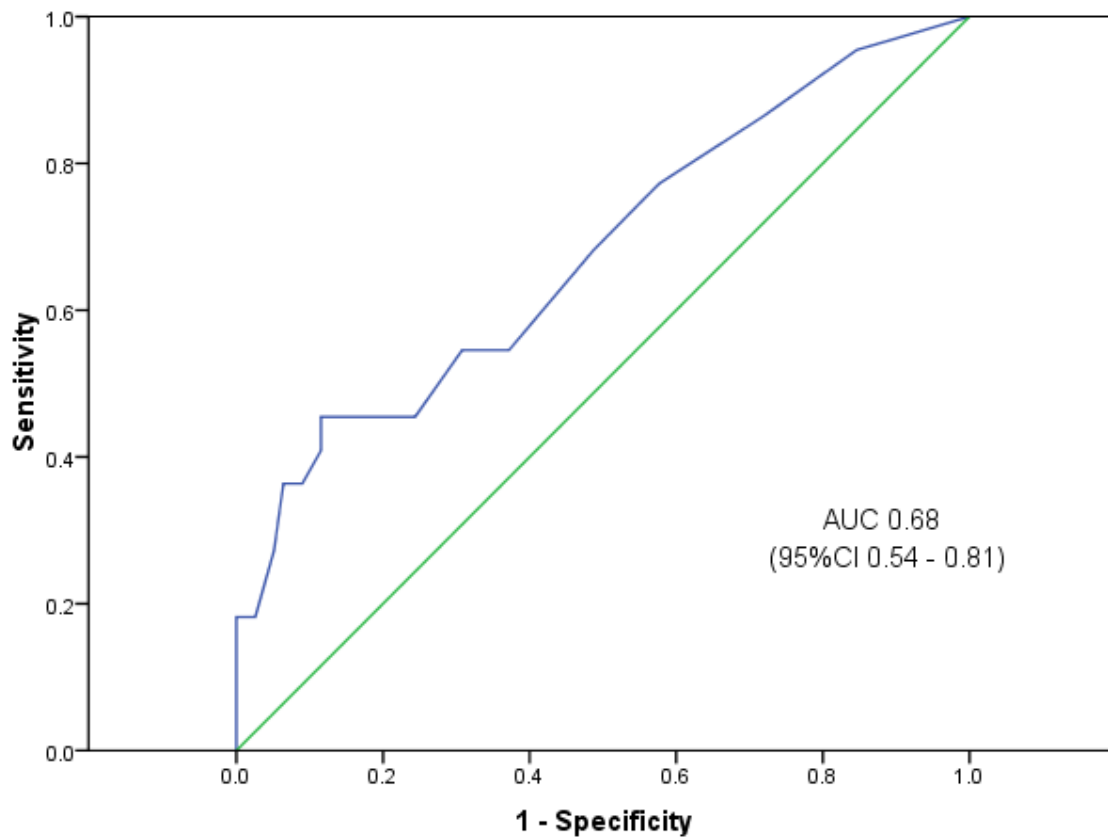

**Figure S2. Receiver operating characteristic curve for diagnosis of respiratory virus infection using the Johnston URTI score[11]**

AUC: area under the curve; URTI: upper respiratory tract infection

## REFERENCES

1. Saunders N, Zambon M, Sharp I et al. Guidance on the development and validation of diagnostic tests that depend on nucleic acid amplification and detection. *J Clin Virol* 2013;**56**(3):260-70
2. Heim A, Ebnet C, Harste G et al. Rapid and quantitative detection of human adenovirus DNA by real-time PCR. *J Med Virol* 2003;**70**(2):228-39
3. CDC protocol of realtime RTPCR for influenza A(H1N1): World Health Organization, 2009
4. Maertzdorf J, Wang CK, Brown JB et al. Real-time reverse transcriptase PCR assay for detection of human metapneumoviruses from all known genetic lineages. *J Clin Microbiol* 2004;**42**(3):981-6
5. van Elden LJ, van Loon AM, van der Beek A et al. Applicability of a real-time quantitative PCR assay for diagnosis of respiratory syncytial virus infection in immunocompromised adults. *J Clin Microbiol* 2003;**41**(9):4378-81
6. Scheltinga SA, Templeton KE, Beersma MF et al. Diagnosis of human metapneumovirus and rhinovirus in patients with respiratory tract infections by an internally controlled multiplex real-time RNA PCR. *J Clin Virol* 2005;**33**(4):306-11
7. Lee WM, Kiesner C, Pappas T et al. A diverse group of previously unrecognized human rhinoviruses are common causes of respiratory illnesses in infants. *PLoS One* 2007;**2**(10):e966
8. Larkin MA, Blackshields G, Brown NP et al. Clustal W and Clustal X version 2.0. *Bioinformatics* 2007;**23**(21):2947-8
9. Tamura K, Peterson D, Peterson N et al. MEGA5: molecular evolutionary genetics analysis using maximum likelihood, evolutionary distance, and maximum parsimony methods. *Mol Biol Evol* 2011;**28**(10):2731-9

10. Fuchs H, Borowitz D, Christiansen D et al. Effect of aerosolized recombinant human DNase on exacerbations of respiratory symptoms and on pulmonary function in patients with cystic fibrosis. The Pulmozyme Study Group. *N Engl J Med* 1994;**331**(10):637-42
11. Johnston S, Pattemore P, Sanderson G, et al. Community study of role of viral infections in exacerbations of asthma in 9-11 year old children. *BMJ* 1995;**310**(6989):1225-9
